# Supplementary material for: The Npa1p complex chaperones the assembly of the earliest eukaryotic large ribosomal subunit precursor
Source: PubMed Central journal article supplement (PMC6136799; doi:10.1371/journal.pgen.1007597), 2018-08-31
Supplement: pgen.1007597.s006.pdf [file pgen.1007597.s006.pdf]

A

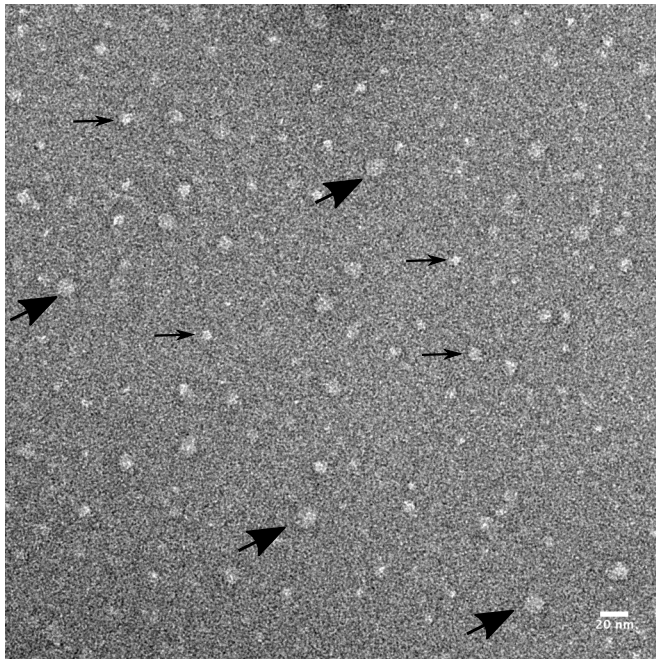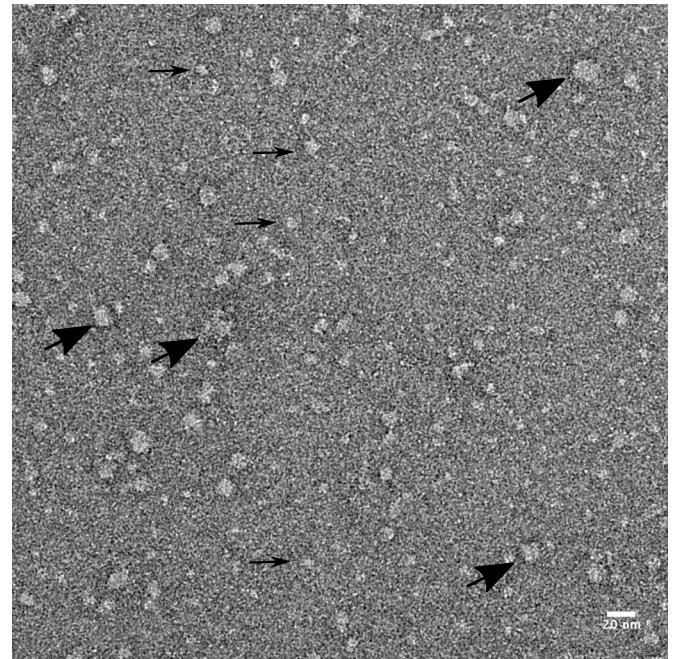

B

Particles of 20 nm  
in diameter

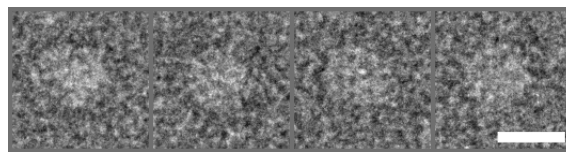

raw images

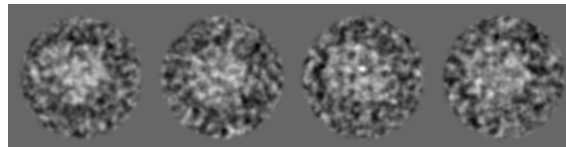

filtered images

Particles of 10 nm  
in diameter

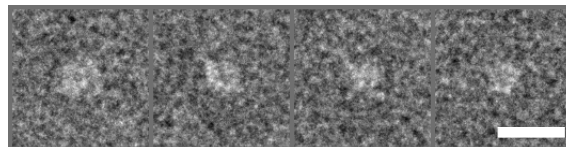

raw images

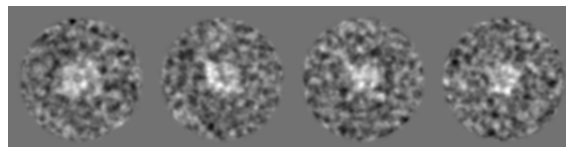

filtered images
