# Supplementary material for: The Npa1p complex chaperones the assembly of the earliest eukaryotic large ribosomal subunit precursor
Source: PubMed Central journal article supplement (PMC6136799; doi:10.1371/journal.pgen.1007597), 2018-08-31

A

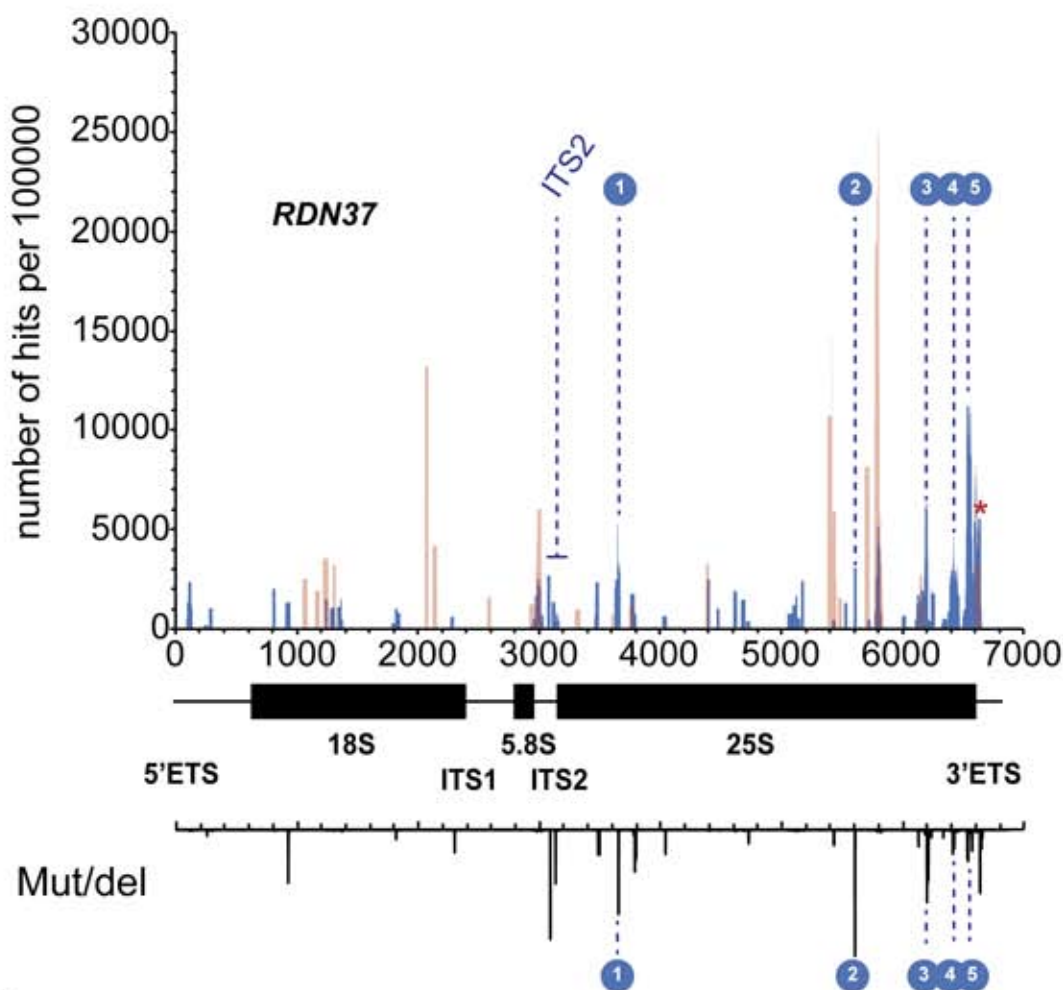

B

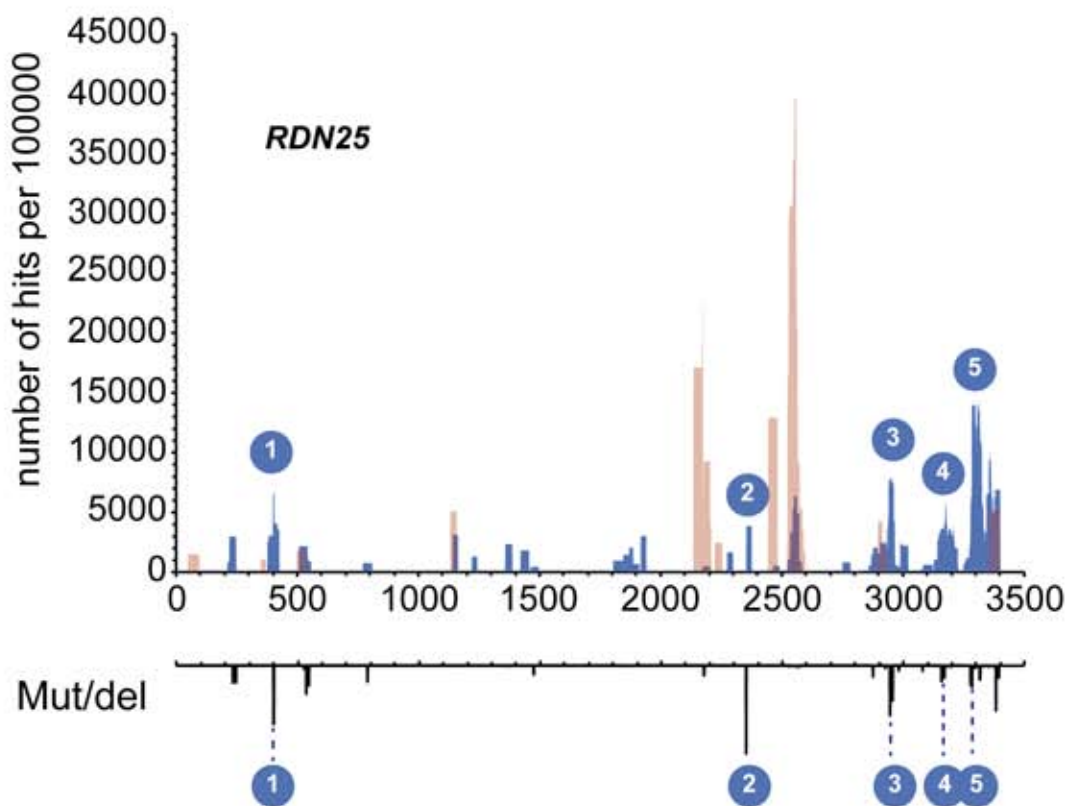

Supplement: pgen.1007597.s019.pdf [file pgen.1007597.s019.pdf]
